# Supplementary material for: Recombinant expression of selectively sulfated proteins in Escherichia coli
Source: Springer Nature journal article supplement (doi:10.1038/nbt1254), 2006-10-29
Supplement: nbt1254-S4.pdf [file nbt1254-S4.pdf]

Supplementary Table 1. Thrombin inhibition kinetic constants derived from non-linear fitting of progress curves as described in Methods (averaged over at least 3 readings with standard deviations reported).

|                 | $K_i$        | $k_{on} \times 10^{-8} \text{ (M}^{-1}\text{s}^{-1}\text{)}$ | $k_{off} \times 10^5 \text{ (s}^{-1}\text{)}$ |
|-----------------|--------------|--------------------------------------------------------------|-----------------------------------------------|
| Sulfo-hirudin   | $26 \pm 9.8$ | $0.95 \pm 0.56$                                              | $0.22 \pm 0.06$                               |
| Desulfo-hirudin | $307 \pm 72$ | $0.38 \pm 0.07$                                              | $1.18 \pm 0.45$                               |
